# Supplementary material for: Synthesis of activated carbon/polyaniline nanocomposites for enhanced CO2 adsorption
Source: Royal Society of Chemistry journal article supplement (doi:10.1039/c6ra00884d), 2016-01-01
Supplement: c6ra00884d1.pdf [file c6ra00884d1.pdf]

## **Electronic Supplementary Information**

### **Synthesis of Activated carbon/polyaniline nanocomposites for enhanced CO<sub>2</sub> Adsorption**

S. Khalili<sup>a</sup>, B. Khoshandam<sup>a,\*</sup>, M. Jahanshahi<sup>b</sup>

<sup>a</sup> Faculty of Chemical, Petroleum and Gas Engineering, Semnan University, Semnan, Iran.

<sup>b</sup> Nanotechnology Institute, Chemical Engineering Department, Babol University of  
Technology, Babol, Iran.

Email: [bkhoshandam@semnan.ac.ir](mailto:bkhoshandam@semnan.ac.ir)

Ph: +98 2313354100; Fax: +98 2313354120

Table S1 Parameters of Langmuir, Freundlich and Sips isotherm models.

| Adsorbent                 | Temperature<br>(K) | Langmuir             |       |       | Freundlich |       |       | Sips                 |        |       |       |
|---------------------------|--------------------|----------------------|-------|-------|------------|-------|-------|----------------------|--------|-------|-------|
|                           |                    | $q_m(\text{mmol/g})$ | b     | $R^2$ | K          | n     | $R^2$ | $q_m(\text{mmol/g})$ | b      | n     | $R^2$ |
| AC                        | 298                | 9.464                | 0.258 | 0.999 | 2.325      | 2.260 | 0.978 | 9.751                | 0.247  | 1.039 | 1.000 |
|                           | 308                | 8.641                | 0.196 | 0.999 | 1.826      | 2.106 | 0.982 | 9.105                | 0.184  | 1.033 | 1.000 |
|                           | 318                | 8.218                | 0.157 | 0.998 | 1.444      | 1.922 | 0.984 | 8.508                | 0.148  | 1.006 | 0.999 |
| CO <sub>2</sub> AC-PANI-F | 298                | 14.520               | 0.178 | 0.993 | 2.957      | 2.089 | 0.998 | 28.473               | 0.1070 | 1.565 | 0.999 |
|                           | 308                | 14.418               | 0.128 | 0.997 | 2.250      | 1.859 | 0.998 | 22.356               | 0.0976 | 1.330 | 1.000 |
|                           | 318                | 14.216               | 0.100 | 0.997 | 1.692      | 1.661 | 0.996 | 19.121               | 0.0826 | 1.185 | 0.999 |
| AC-PANI-S                 | 298                | 19.758               | 0.152 | 0.996 | 3.478      | 1.932 | 0.996 | 30.256               | 0.114  | 1.345 | 0.999 |
|                           | 308                | 19.672               | 0.102 | 0.994 | 2.557      | 1.747 | 0.997 | 26.424               | 0.087  | 1.203 | 0.999 |
|                           | 318                | 18.980               | 0.075 | 0.993 | 1.849      | 1.600 | 0.997 | 23.968               | 0.066  | 1.135 | 1.000 |

Table S2 Sips parameters to represent pure nitrogen isotherm data at 298 K for AC and nanocomposites.

| Adsorbent | n     | b     | $q_m(\text{mmol/g})$ | $R^2$ |
|-----------|-------|-------|----------------------|-------|
| AC        | 1.752 | 0.159 | 6.130                | 0.999 |
| AC-PANI-F | 1.465 | 0.111 | 4.686                | 0.999 |
| AC-PANI-S | 1.800 | 0.143 | 5.599                | 1.000 |

Table S3 Comparison of CO<sub>2</sub> adsorption capacity with other adsorbents.

| Adsorbent          | Amine           | Adsorption Capacity(mmol.g <sup>-1</sup> ) | Pressure(bar) | Temperature(K) | Refs.      |
|--------------------|-----------------|--------------------------------------------|---------------|----------------|------------|
| β-zeolite          | MEA             | 0.77                                       | 1             | 303            | 66         |
| MWCNT              | PEI             | 2.14                                       | 1             | 298            | 67         |
| MWCNT              | AEAPTS          | 2.59                                       | 0.5           | 293            | 68         |
| MWCNT              | mPDA            | 2.94                                       | 1             | 298            | 57         |
| Zeolite 13X        | MEA             | 1.11                                       | 1             | 348            | 69         |
| Zeolite            | AMP             | 0.62                                       | 1             | 298            | 70         |
| Zeolite 13X        | IPA             | 0.52                                       | 1             | 298            | 71         |
| Silica (MCM-41)    | APTES           | 1.63                                       | 1             | 298            | 72         |
| Silica (SBA-15)    | PEI             | 1.72                                       | 1             | 298            | 73         |
| Silica (SBA-15)    | TEPA            | 2.22                                       | 1             | 298            | 73         |
| Silica (PE-MCM-41) | DAEAPTS         | 2.62                                       | 0.05          | 298            | 74         |
| MOF                | PEI             | 4.2                                        | 0.15          | 298            | 75         |
| Activated carbon   | AMP             | 1.5                                        | 1             | 298            | 76         |
| Activated carbon   | MEA             | 1.02                                       | 1             | 298            | 69         |
| Activated carbon   | TEA             | 0.32                                       | 1             | 298            | 69         |
| Activated carbon   | PEI             | 2.28                                       | 1             | 298            | 77         |
| Graphene           | PANI nanosphere | 2.20                                       | 1             | 298            | 78         |
| Activated carbon   | PANI nanofiber  | 2.69                                       | 1             | 298            | This study |
| Activated carbon   | PANI nanosphere | 3.16                                       | 1             | 298            | This study |

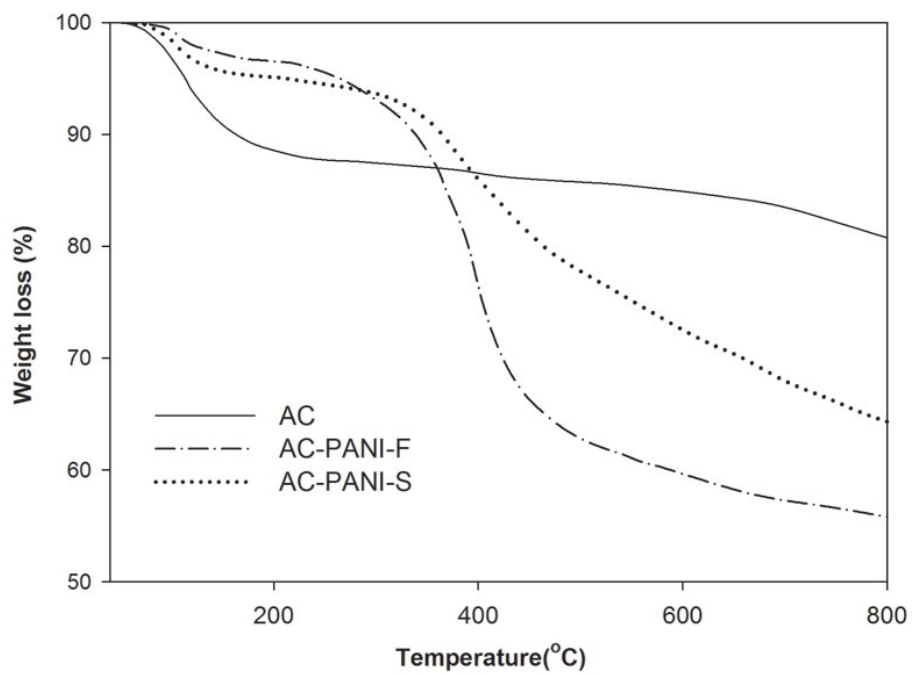

Fig. S1 TGA curves of AC before and after functionalization with PANI.

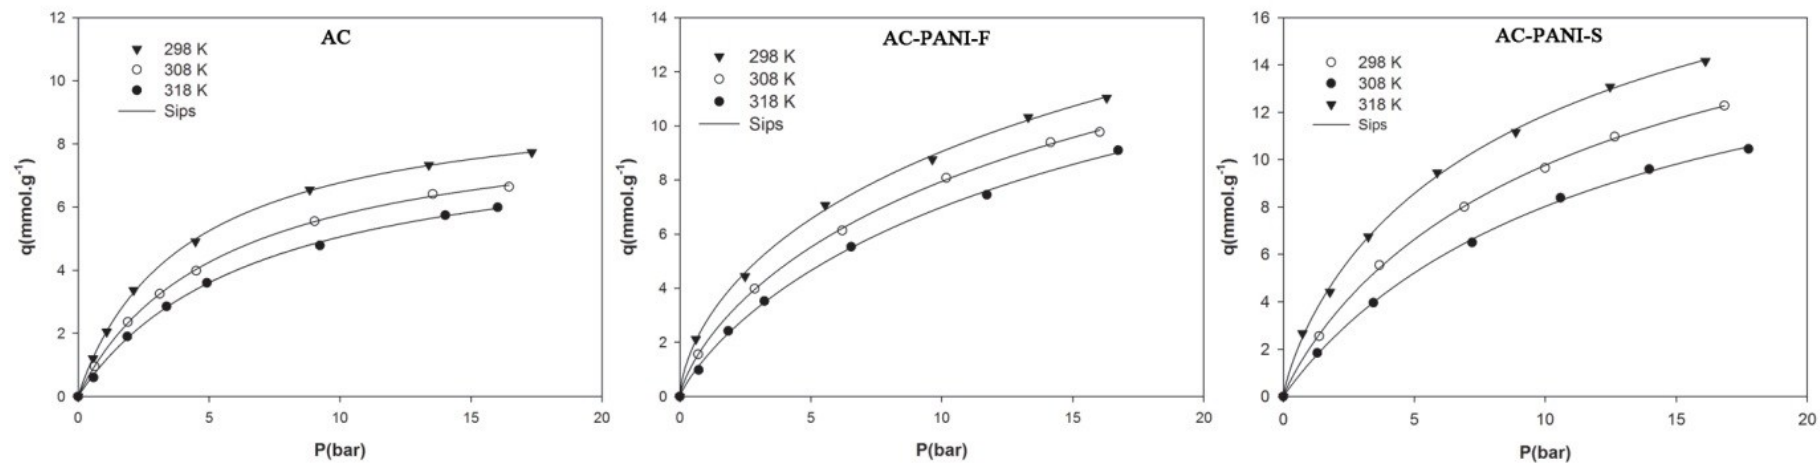

Fig.S2 Experimental CO<sub>2</sub> adsorption data of adsorbents at different temperatures along Sips model isotherm.

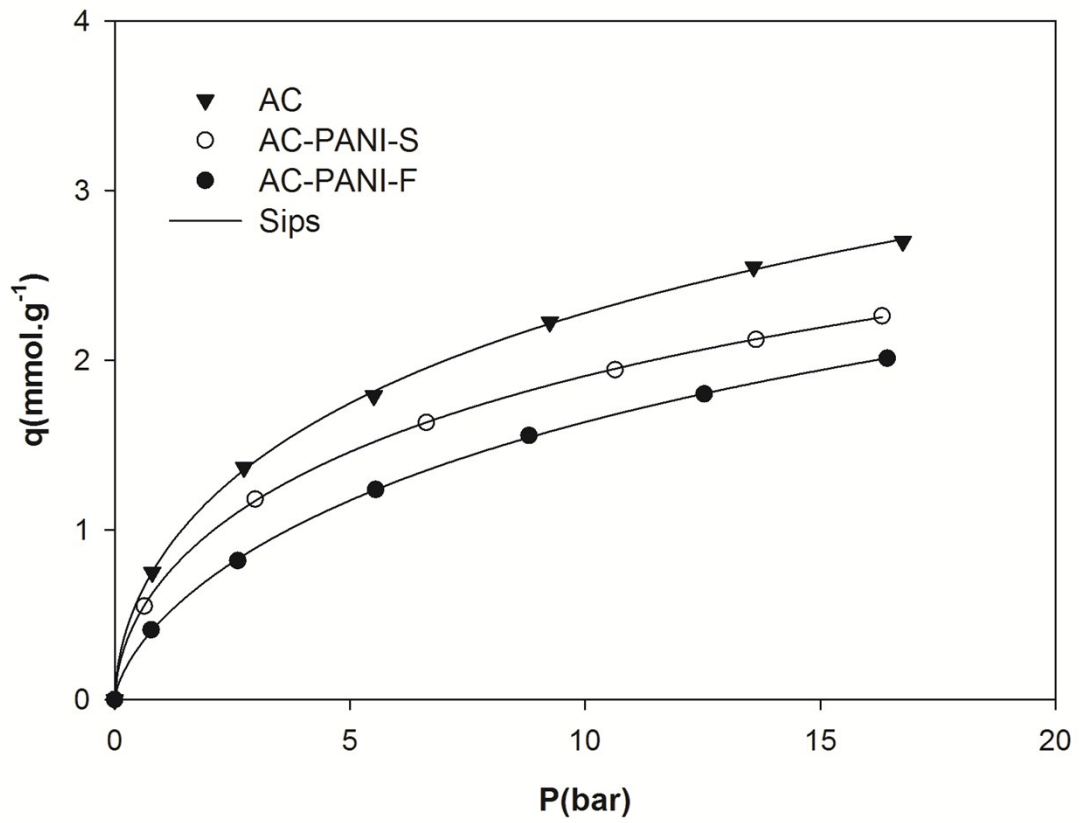

Fig. S3 Pure gas isotherms of N<sub>2</sub> on AC and nanocomposites at 298 K along with Sips model isotherm.

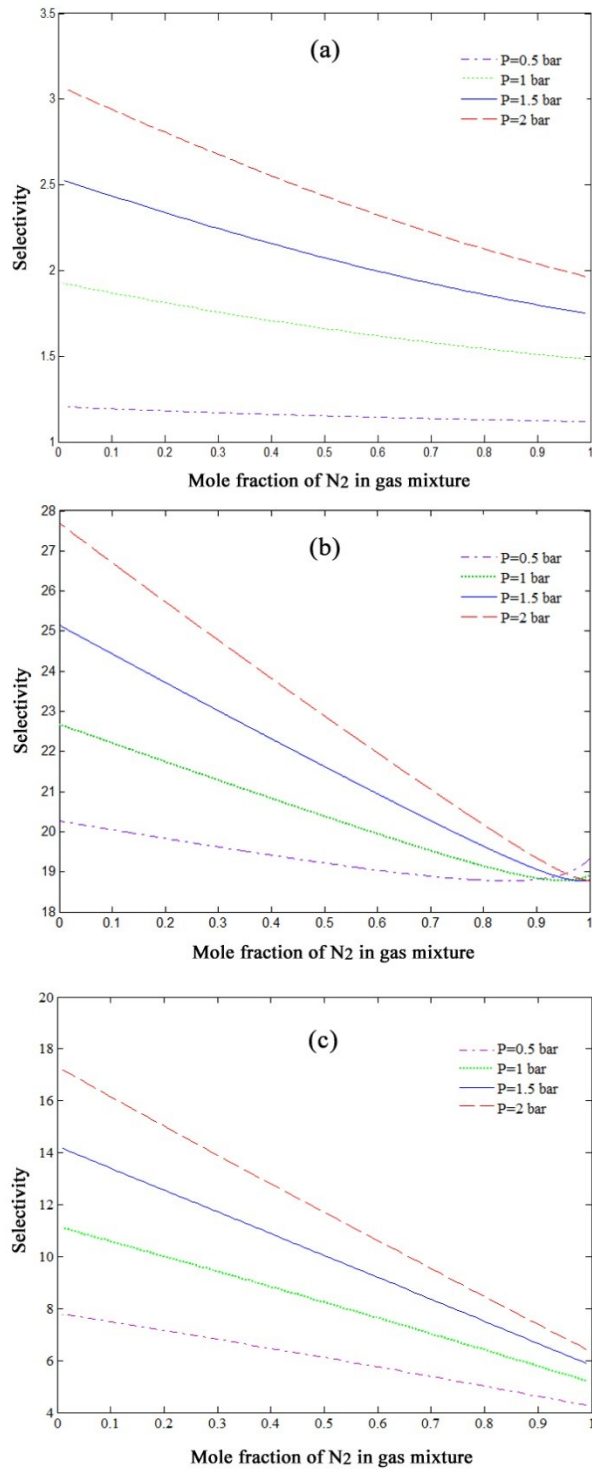

Fig. S4 Ideal selectivity for CO<sub>2</sub>/N<sub>2</sub> system on AC (a), AC-PANI-F (b) and AC-PANI-S (c) at 298 K and different pressures.
